# Supplementary material for: Combatting ionic aggregation using dielectric forces—combining modeling/simulation and experimental results to explain end-capping of primary amine functionalized polystyrene
Source: Royal Society of Chemistry journal article supplement (doi:10.1039/c1py00226k), 2011-01-01

## Supplementary Information

Figure S-1: GPC chromatograms showing the influence of additives on the elution of PS-NH<sub>2</sub> ( $M_n = 1,400$ , PDI = 1.08) using THF as the mobile phase. The top set of chromatograms show the normalized SEC-UV responses and the bottom set of chromatograms show the normalized light scattering (90° detector) responses for PS-NH<sub>2</sub> using triethylamine (TEA; red line), hexafluoroisopropanol (HFIP; green line), and no (black line) additive, respectively. SEC was performed using a Waters Model 600E Fluid Handling Unit equipped with a Waters Model 717 plus autosampler, two Polymer Labs PLgel 5  $\mu\text{m}$  mixed-C columns in series, a Waters Model 410 refractive index detector, a Waters Model 996 photodiode array detector, and a two-angle laser light scattering detector (PD 2020, Precision Detectors Inc.). MALDI TOF MS and TLC of this polymer show the presence of only PS-NH<sub>2</sub>. There is no unfunctionalized PS (PS-H or PS with head-to-head dimer).

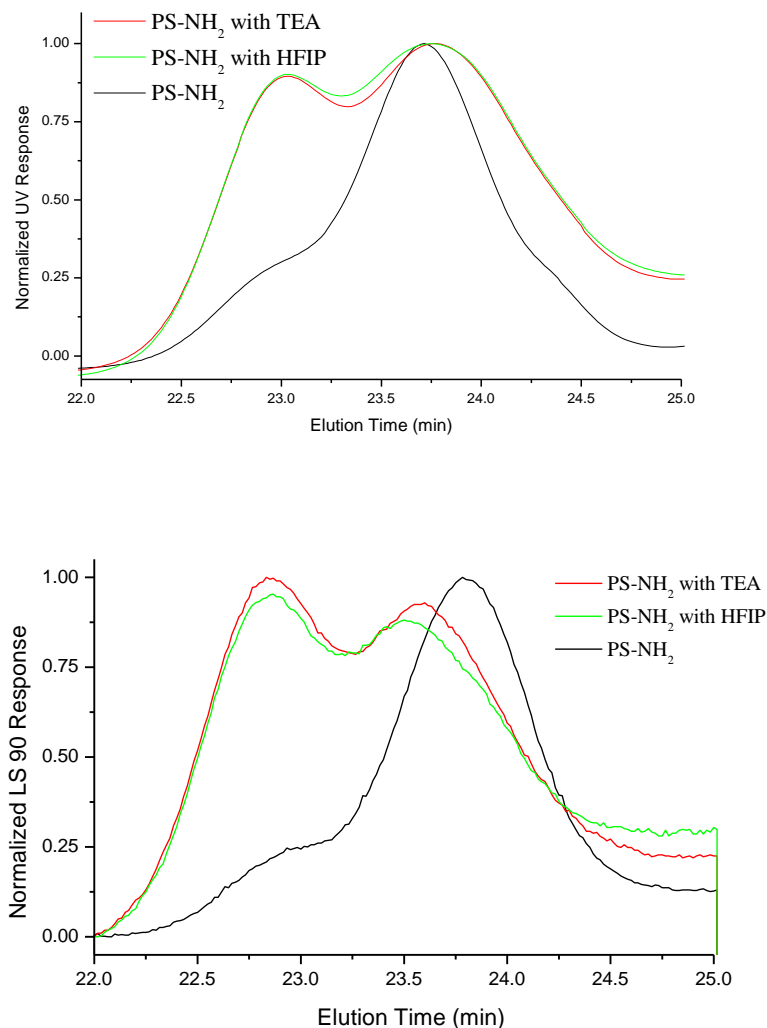

Supplement: c1py00226k.pdf [file c1py00226k.pdf]
